# Supplementary material
Source: PubMed Central journal article supplement (PMC8138547)
Supplement: bloodBLD2020010529-suppl1.pdf [file bloodBLD2020010529-suppl1.pdf]

**Supplemental Table 1. Anticoagulant Medications**

| <b>Anticoagulation</b>               | <b>Prophylactic</b> | <b>Treatment</b> |
|--------------------------------------|---------------------|------------------|
| Unfractionated heparin SQ, any dose  | X                   |                  |
| Fondaparinux any dose < 7.5 mg daily | X                   |                  |
| Fondaparinux any dose ≥ 7.5 mg daily |                     | X                |
| Unfractionated heparin IV            |                     | X                |
| Argatroban IV                        |                     | X                |
| Apixaban any dose < 10 mg daily      | X                   |                  |
| Apixaban any dose ≥ 10 mg daily      |                     | X                |
| Dabigatran 150 mg twice a day        |                     | X                |
| Coumadin/warfarin any dose           |                     | X                |
| Rivaroxaban any dose < 20 mg daily   | X                   |                  |
| Rivaroxaban any dose ≥ 20 mg daily   |                     | X                |
| Enoxaparin any dose < 80mg daily     | X                   |                  |
| Enoxaparin any dose ≥ 80mg daily     |                     | X                |

Abbreviations: IV, intravenous.

**Appendix 1.** Demographic characteristics and comorbidities of alive and discharged patients that were not contacted

| <b>Population characteristics (N = 3262)</b> |             |
|----------------------------------------------|-------------|
| <b>Age (Mean (SD))</b>                       | 62.2 (17.5) |
| <b>Gender (N (%))</b>                        |             |
| Male                                         | 1812 (55.5) |
| Female                                       | 1450 (44.5) |
| <b>Race (N (%))</b>                          |             |
| African American/Black                       | 675 (20.7)  |
| Asian                                        | 268 (8.2)   |
| Caucasian/White                              | 1178 (36.1) |
| Other                                        | 893 (27.4)  |
| Unknown                                      | 248 (7.6)   |
| <b>Ethnicity</b>                             |             |
| Hispanic or Latino                           | 728 (22.3)  |
| Not Hispanic or Latino                       | 2165 (66.4) |
| Unknown                                      | 183 (5.6)   |
| Declined                                     | 186 (5.7)   |
| <b>Comorbidities N (%)</b>                   |             |
| Hypertension                                 | 1335 (40.9) |
| Diabetes mellitus                            | 905 (27.7)  |
| Coronary artery disease                      | 234 (7.1)   |
| Heart failure                                | 142 (4.5)   |
| Atrial fibrillation                          | 198 (6.1)   |
| Valvular Heart disease                       | 6 (0.2)     |
| Chronic Renal disease                        | 185 (5.7)   |

|                                  |            |
|----------------------------------|------------|
| Chronic lung disease             | 234 (7.2)  |
| Chronic liver disease            | 35 (1.1)   |
| Thyroid disease                  | 237 (7.3)  |
| Bleeding (Hx)                    | 372 (11.4) |
| Ischemic stroke (Hx)             | 124 (3.8)  |
| Carotid occlusive disease (Hx)   | 129 (4.0)  |
| Peripheral arterial disease (Hx) | 45 (1.4)   |
| Paraplegia/Hemiplegia            | 10 (0.3)   |

**Appendix 2.** Sensitivity Analysis of VTE and ATE without mortality: Multivariable analysis

| <b>Comorbidities</b>             |                   |               |                  |
|----------------------------------|-------------------|---------------|------------------|
| <b>Predictor</b>                 | <b>Odds Ratio</b> | <b>95% CI</b> | <b>p</b>         |
| Age (>75y)                       | 2.08              | 1.41-3.06     | <b>&lt;.0001</b> |
| BMI>35kg/m <sup>2</sup>          | 0.79              | 0.53-1.18     | .442             |
| IMPROVE-DD (≥4)                  | 0.90              | 0.43-1.85     | .767             |
| Anticoagulants (discharge)       | 0.79              | 0.47-1.33     | .368             |
| Antiplatelets (discharge)        | 2.80              | 1.33-5.90     | <b>.007</b>      |
| D-Dimer: 4-6x ULN**              | 1.48              | 0.96-2.29     | .075             |
| D-Dimer: >6x ULN**               | 1.39              | 0.65-2.98     | .396             |
| Personal Hx of VTE               | 12.72             | 6.22-26.03    | <b>&lt;.0001</b> |
| Coronary artery disease          | 1.26              | 0.70-2.24     | <b>.442</b>      |
| Peripheral arterial disease (Hx) | 2.93              | 1.41-6.12     | <b>.004</b>      |
| Carotid occlusive disease (Hx)   | 1.49              | 0.78-2.85     | .225             |
| Heart failure                    | 0.68              | 0.33-1.42     | .306             |
| Chronic renal disease            | 3.07              | 1.89-4.98     | <b>&lt;.0001</b> |
| Family History of VTE            | 4.31              | 1.94-9.55     | <b>0.0003</b>    |
| ICU admission                    | 2.22              | 1.78-2.93     | <b>&lt;.0001</b> |
